# Supplementary material for: Gravimetric and electrochemical statistical optimizations for improving copper corrosion resistance in hydrochloric acid using thiosemicarbazone-linked 3-acetylpyridine
Source: Royal Society of Chemistry journal article supplement (doi:10.1039/d2ra05192c), 2022-01-01
Supplement: d2ra05192c14.pdf [file d2ra05192c14.pdf]

## Supplementary Information

*for*

### **Gravimetric and electrochemical statistical optimizations for improving copper corrosion resistance in hydrochloric acid using thiosemicarbazone-linked 3-acetylpyridine**

Muhammad Ammar Mohamad Alwi,<sup>1</sup> Mohammad Norazmi Ahmad,<sup>1</sup> Izan Izwan Misnon,<sup>2</sup>  
and Erna Normaya,<sup>1\*</sup>

<sup>1</sup> Experimental and Theoretical Research Lab, Department of Chemistry, Kulliyah of Science, International Islamic University of Malaysia, 25200 Kuantan, Pahang, Malaysia

<sup>2</sup> Faculty of Industrial Sciences & Technology, Universiti Malaysia Pahang, Lebuhraya Tun Razak, Gambang, 26300 Kuantan, Pahang, Malaysia

**Table S1.** Binding energies (eV), relative intensity, and their assignment for Cl 2p, C 1s, N 1s, S 2p, and Cu 2p peak observed for copper strip in HCl at an optimum concentration of T3AP

| Sample           | Chemical species | Photoemission angle (°) | Assignment                         | BE (eV) | Relative intensities (%) |
|------------------|------------------|-------------------------|------------------------------------|---------|--------------------------|
| Copper (Blank)   | Cl 2p            | 0                       | H-Cl                               | 198.91  | 77.05                    |
|                  |                  |                         | CuCl <sub>2</sub>                  | 200.56  | 22.95                    |
|                  | Cu 2p            | 0                       | Cu <sup>+</sup> /CuCl              | 932.20  | 83.49                    |
|                  |                  |                         | Cu <sup>+</sup> /Cu <sub>2</sub> O | 932.53  | 16.51                    |
| Copper with T3AP | C 1s             | 0                       | C=C                                | 284.74  | 63.51                    |
|                  |                  |                         | C=S                                | 287.89  | 17.18                    |
|                  |                  |                         | C-C                                | 282.48  | 11.77                    |
|                  |                  |                         | C-N/C=N                            | 286.97  | 7.54                     |
| Copper with T3AP | N 1s             | 0                       | N-H                                | 399.17  | 61.41                    |
|                  |                  |                         | N-N/C=N <sup>+</sup>               | 399.11  | 20.13                    |
|                  |                  |                         | N-Cu                               | 398.55  | 12.10                    |
|                  |                  |                         | N-O                                | 397.22  | 6.35                     |
| Copper with T3AP | S 2p             | 0                       | Cu-S                               | 162.40  | 71.40                    |
|                  |                  |                         | C-S                                | 163.25  | 15.06                    |
|                  |                  |                         | S-O                                | 167.52  | 13.76                    |
| Copper with T3AP | Cu 2p            | 0                       | Cu-S                               | 932.02  | 39.00                    |
|                  |                  |                         | Cu-N                               | 933.23  | 21.40                    |
|                  |                  |                         | Cu <sup>+</sup> /CuCl              | 932.26  | 15.62                    |

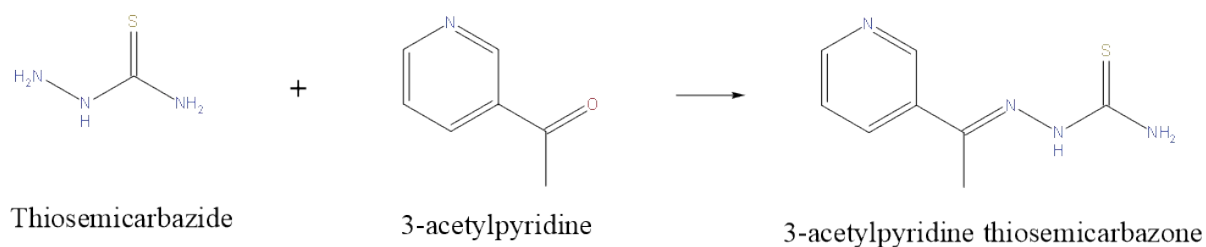

**Figure S1.** The general reaction synthesis of T3AP

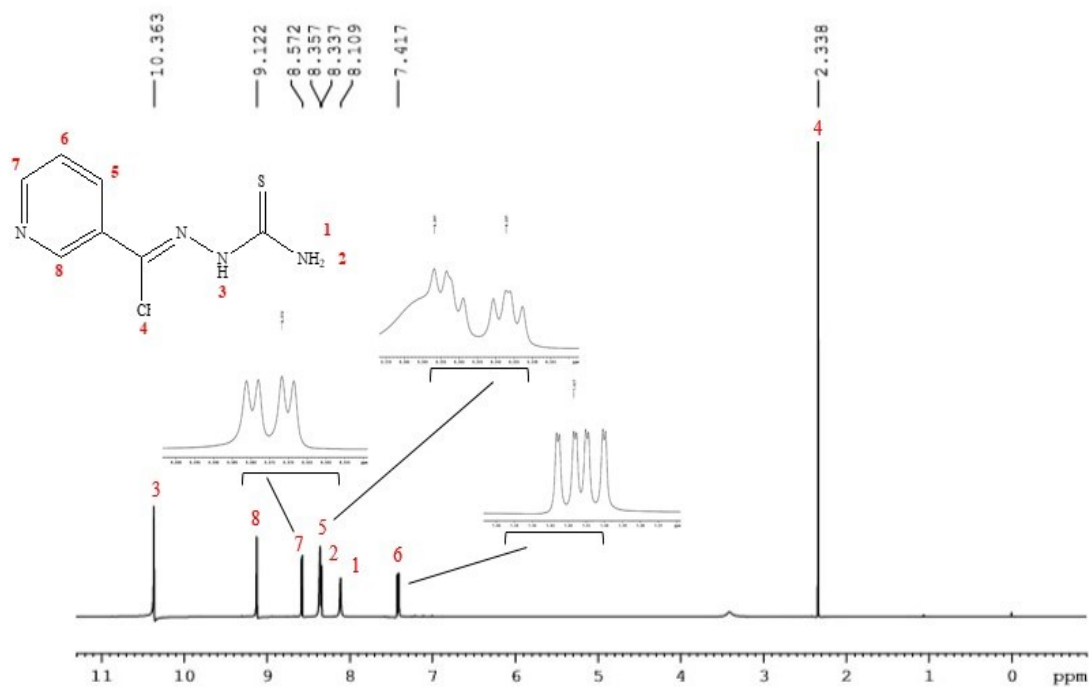

Figure S2. The <sup>1</sup>H NMR spectrum for T3AP compound

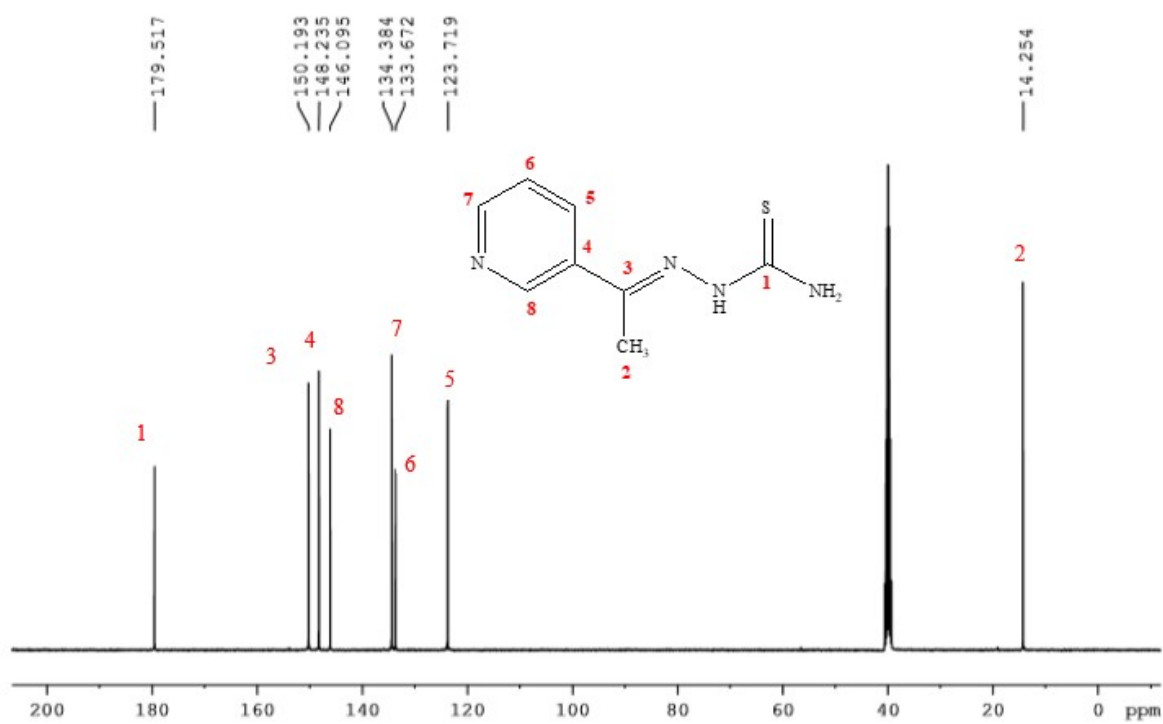

Figure S3. The <sup>13</sup>C NMR spectrum for T3AP compound

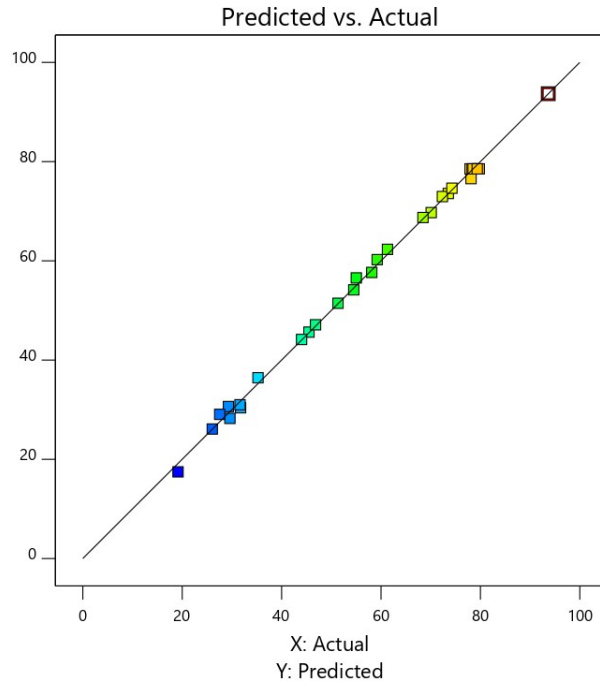

(a)

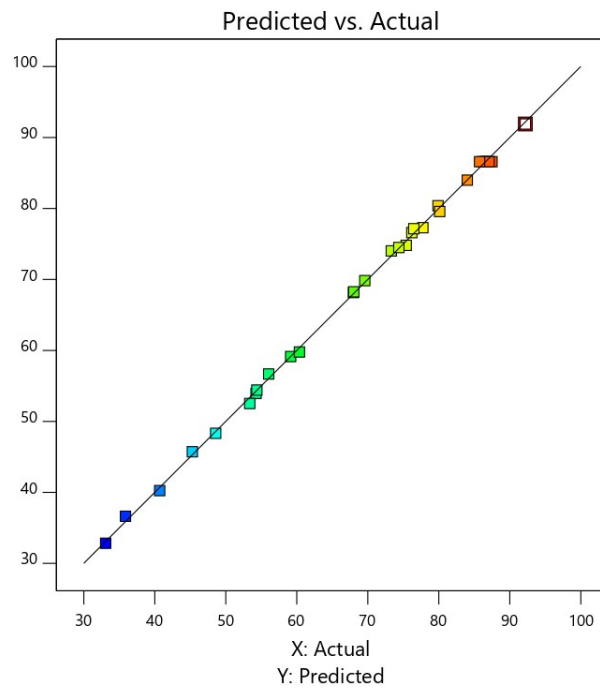

(b)

**Figure S4.** The graph of predicted vs actual data for both responses (a) WL IE, (b) EIS IE

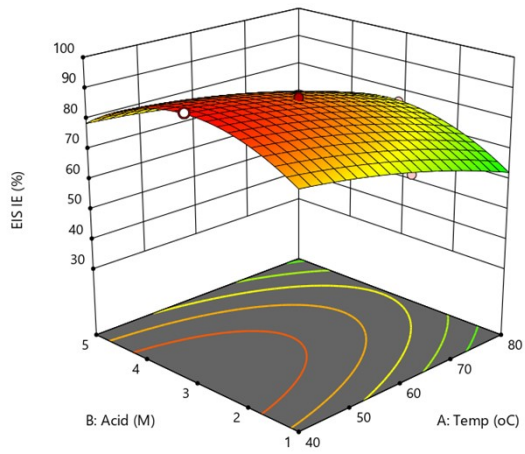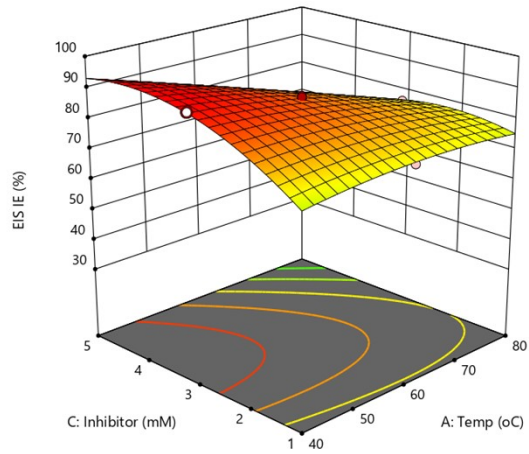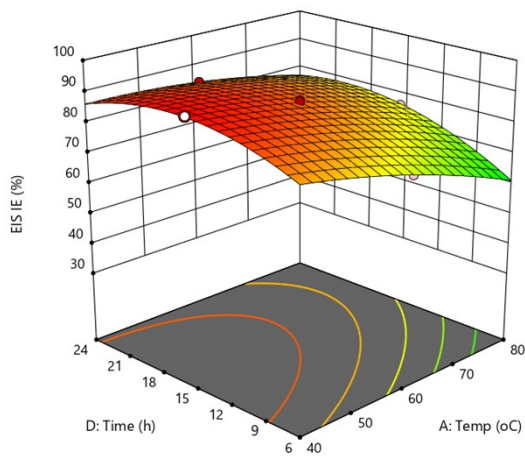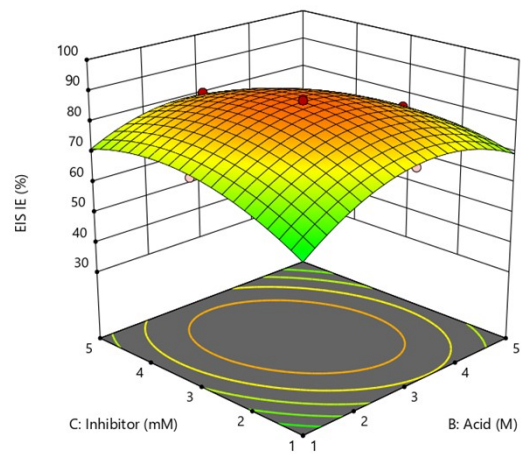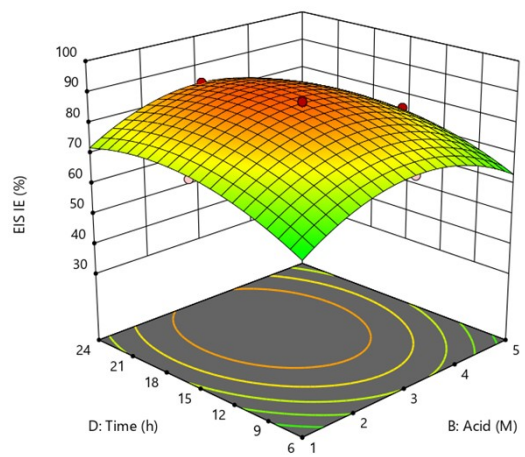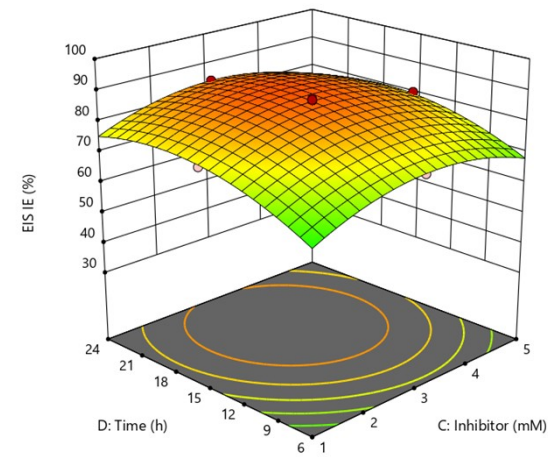

**Figure S5.** 3D graph of EIS inhibition efficiency response of T3AP

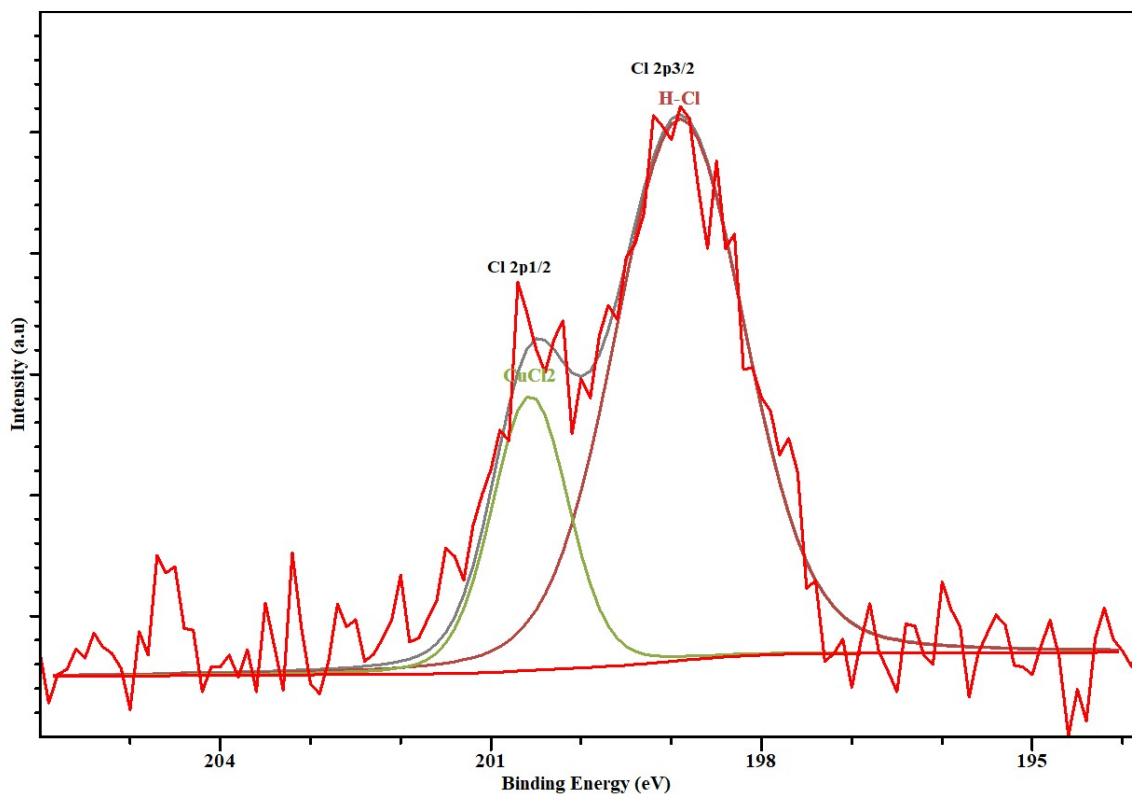

**Figure S6.** The XPS spectrum for Cl 2p of untreated samples

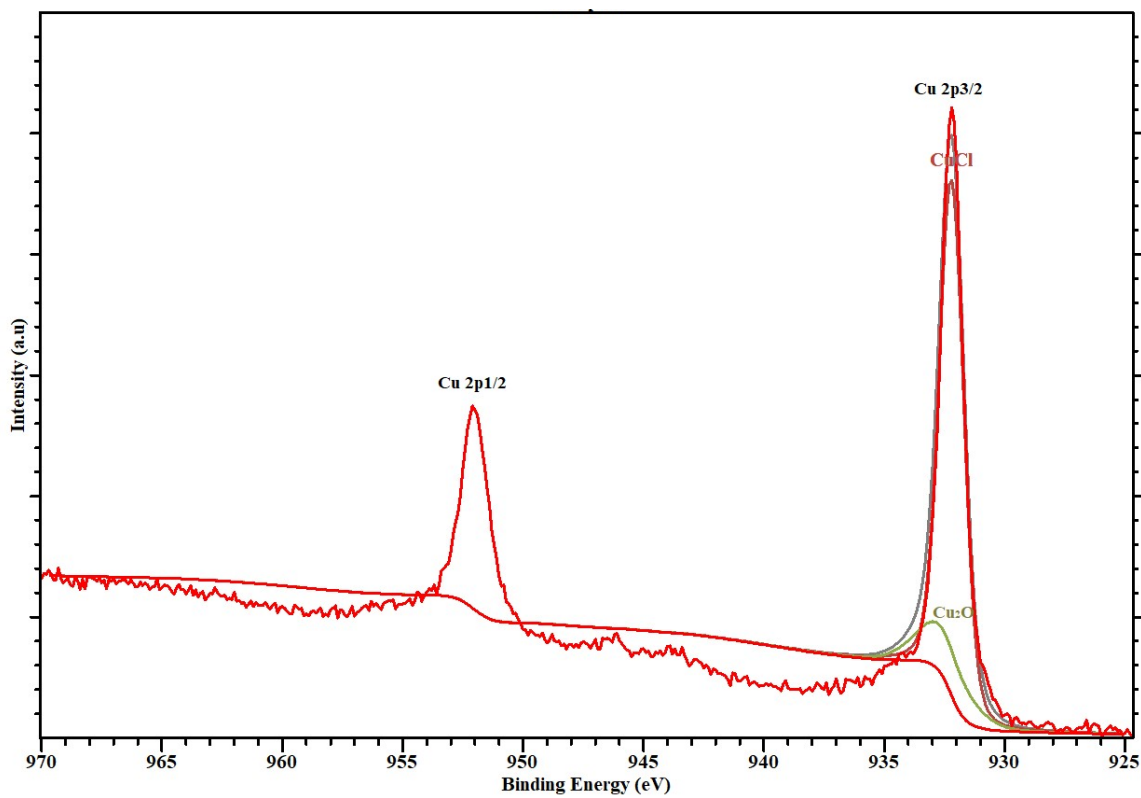

**Figure S7.** The XPS spectrum for Cu 2p of untreated samples

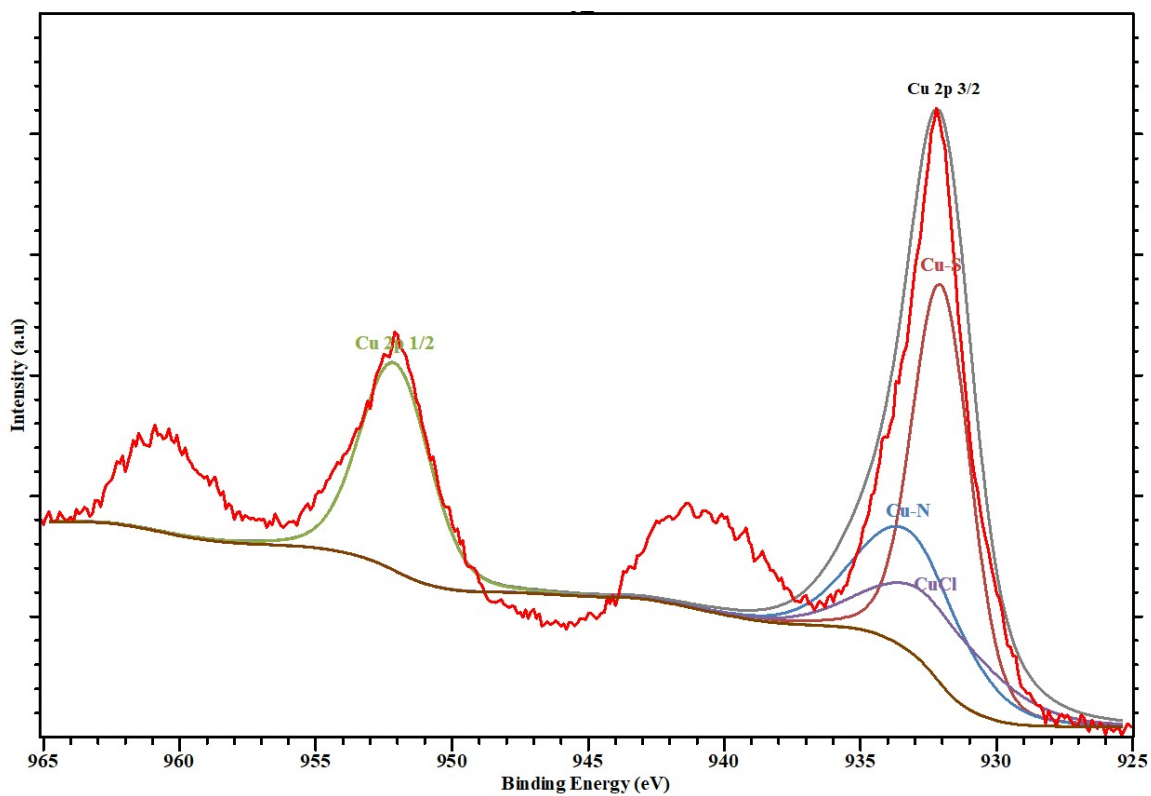

**Figure S8.** The XPS spectrum for Cu 2p of samples with inhibitor T3AP

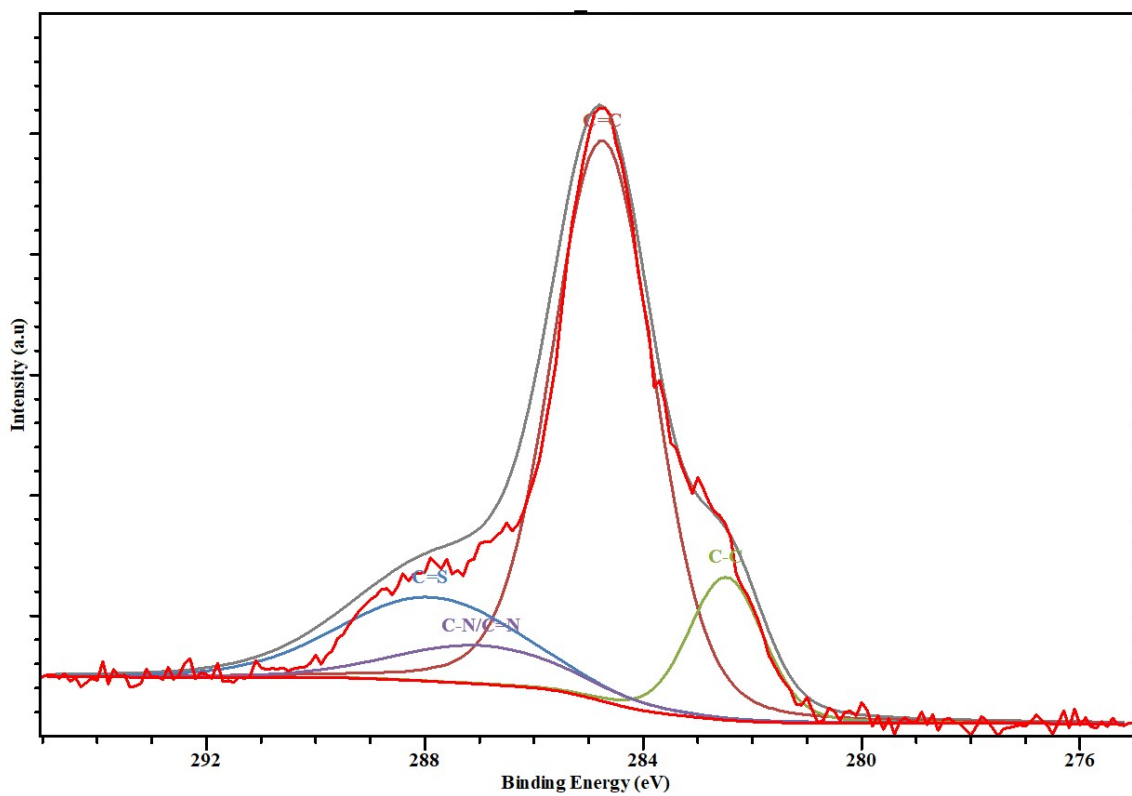

**Figure S9.** The XPS spectrum for C 1s of samples with inhibitor T3AP

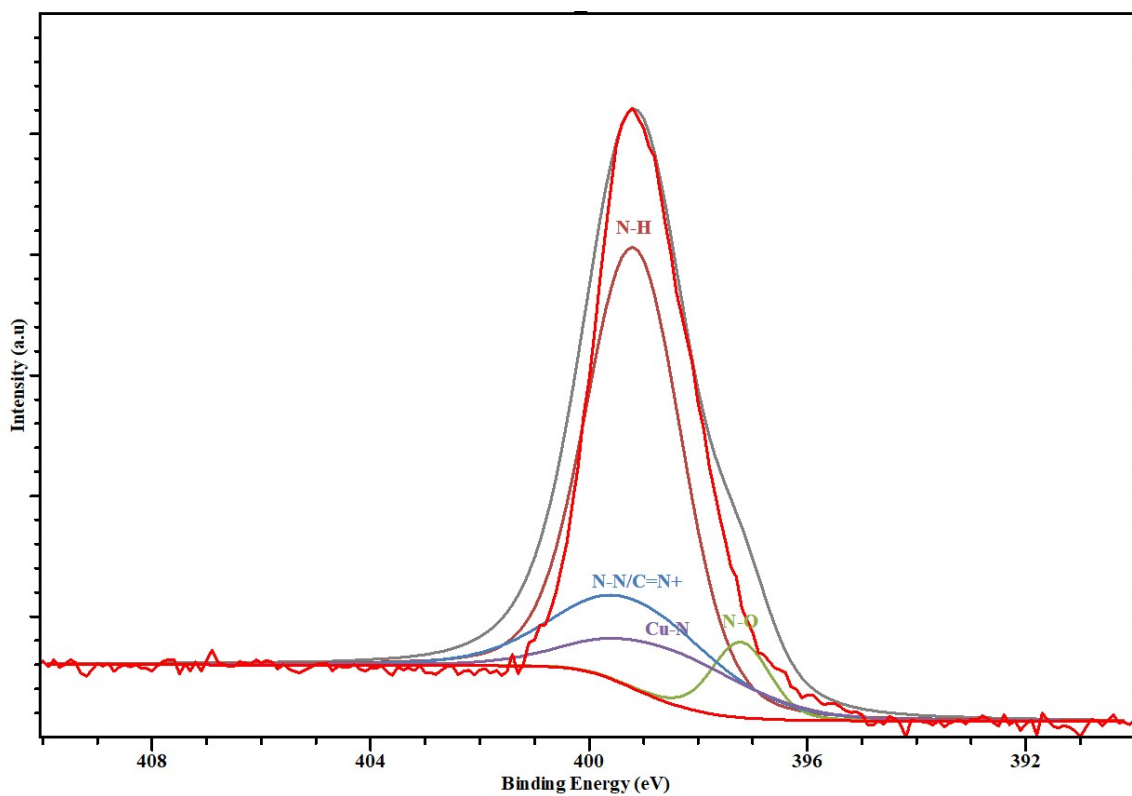

**Figure S10.** The XPS spectrum for N 1s of samples with inhibitor T3AP

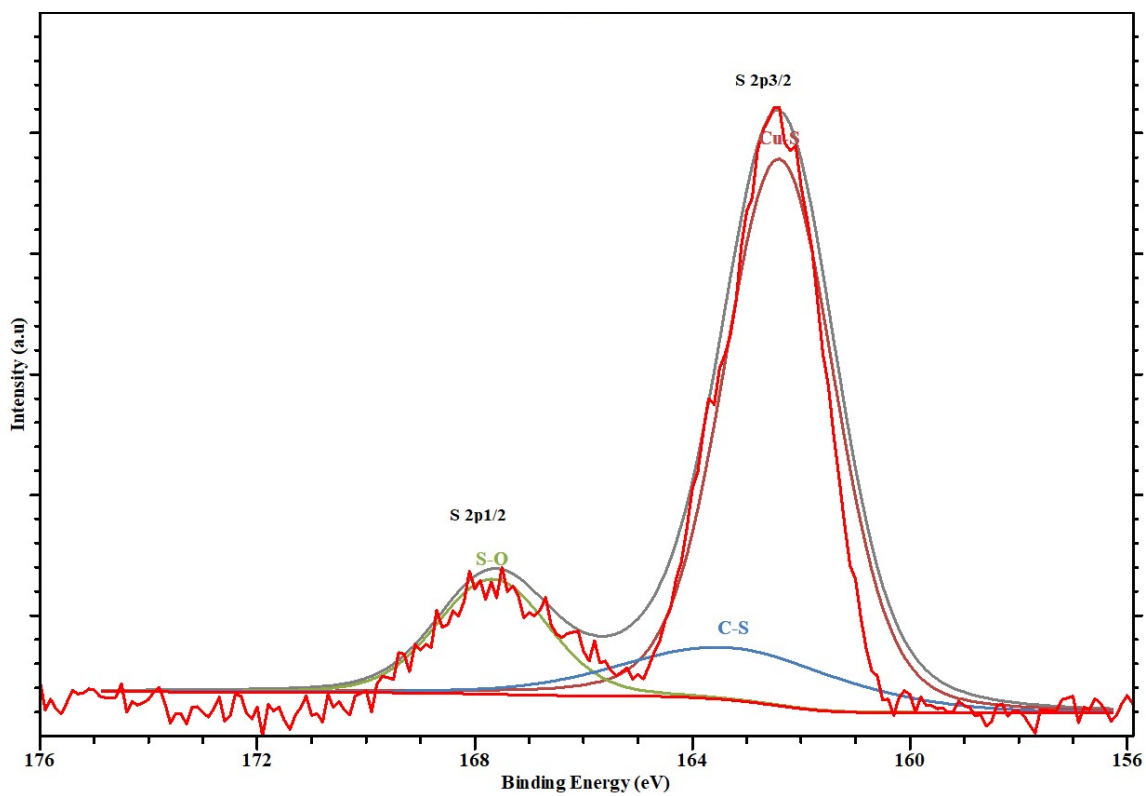

**Figure S11.** The XPS spectrum for S 2p of samples with inhibitor T3AP



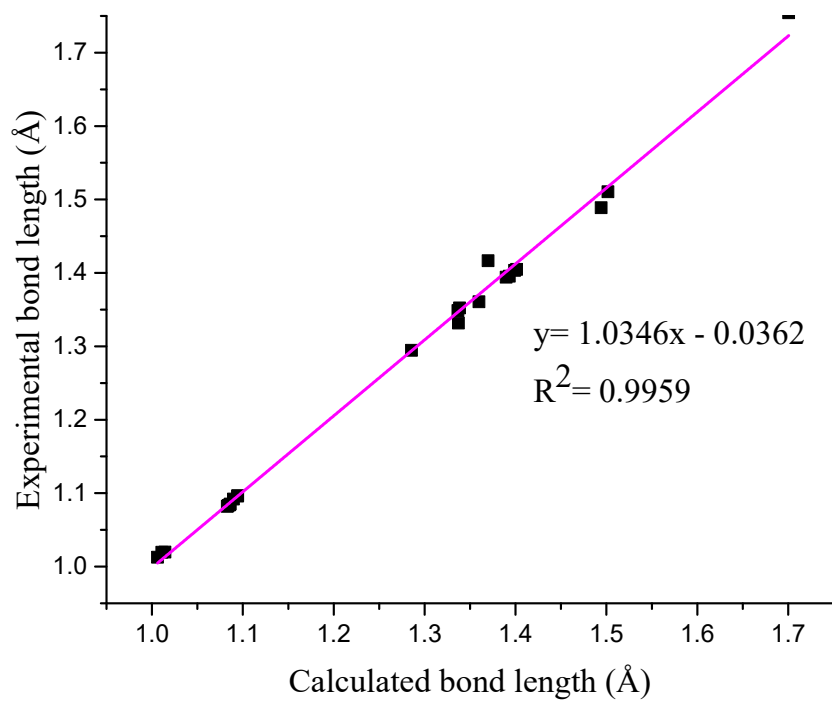

**Figure S12.** The experimental vs theoretical bond length of T3AP compound
