# Supplementary figures and images for: Gravimetric and electrochemical statistical optimizations for improving copper corrosion resistance in hydrochloric acid using thiosemicarbazone-linked 3-acetylpyridine
Source: Royal Society of Chemistry journal article supplement (doi:10.1039/d2ra05192c), 2022-01-01

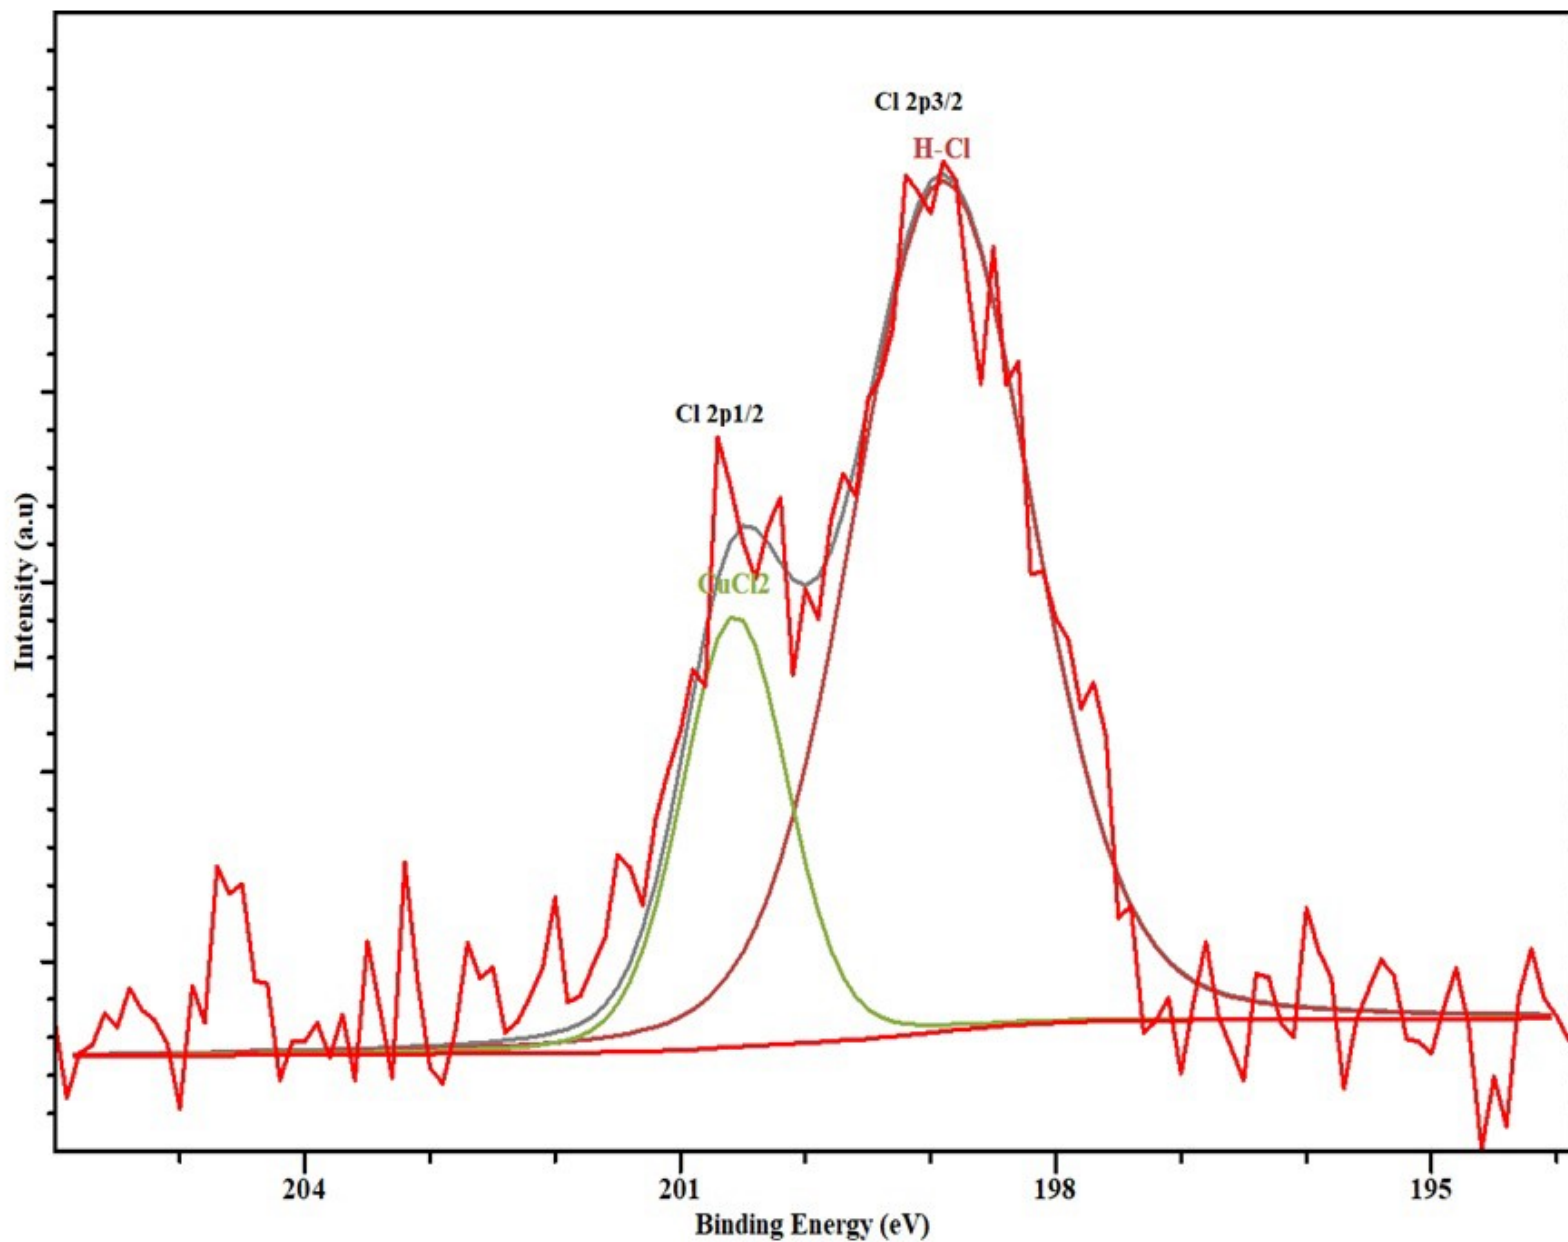

Supplement: d2ra05192c10.pdf [file d2ra05192c10.pdf]

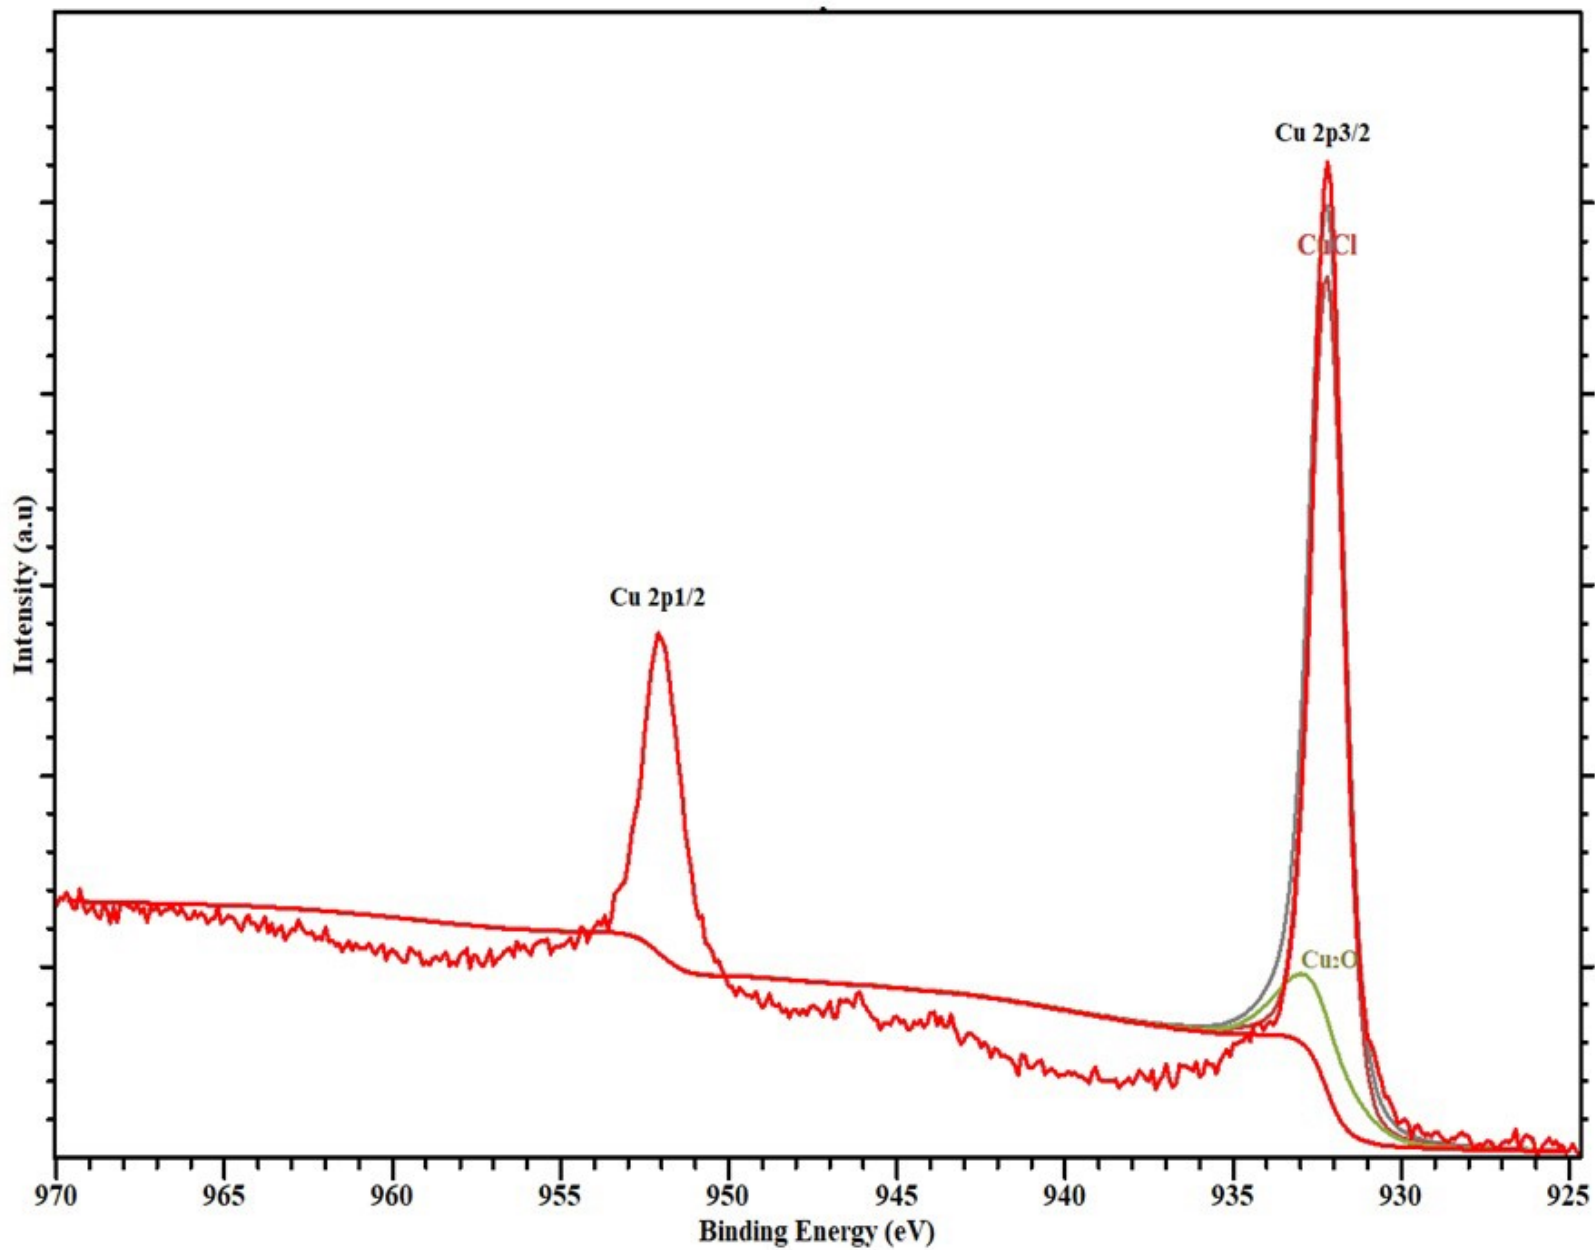

Supplement: d2ra05192c11.pdf [file d2ra05192c11.pdf]

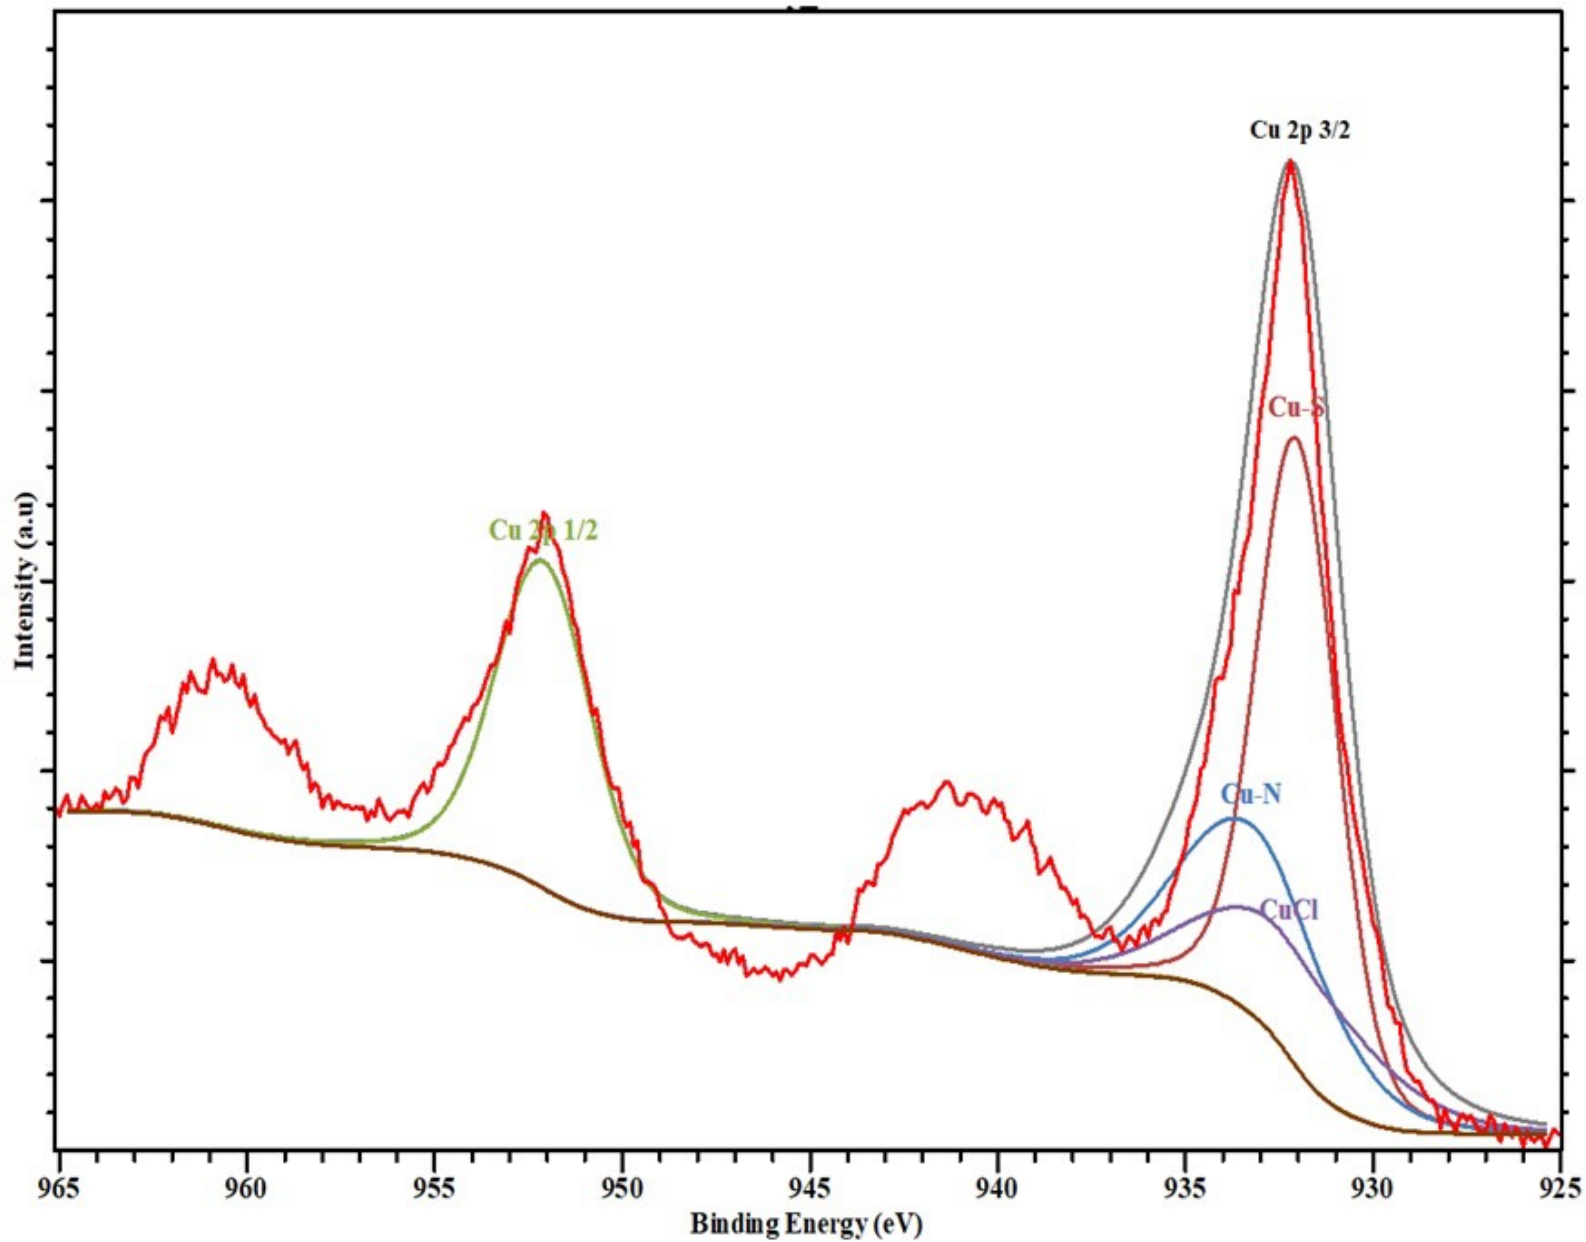

Supplement: d2ra05192c12.pdf [file d2ra05192c12.pdf]

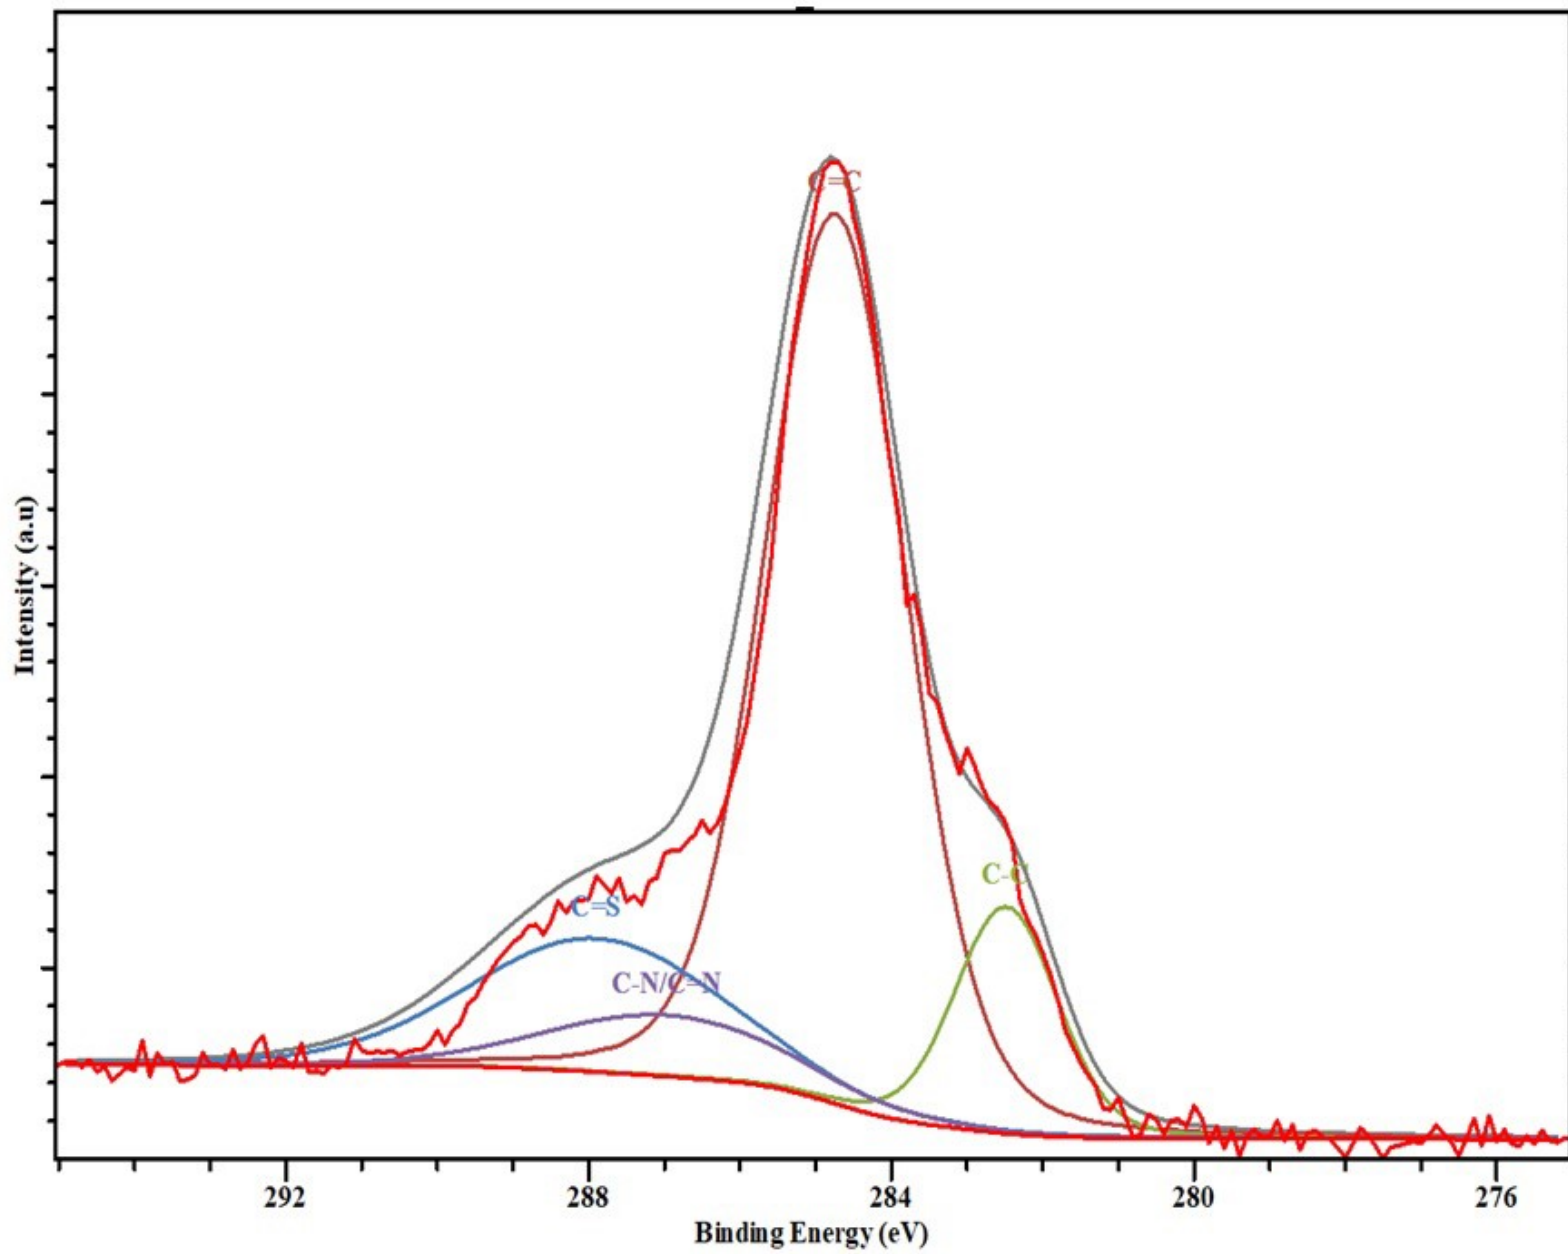

Supplement: d2ra05192c13.pdf [file d2ra05192c13.pdf]

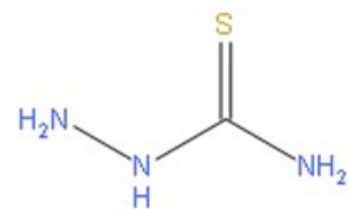

Thiosemicarbazide

+

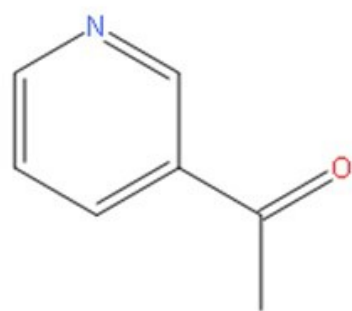

3-acetylpyridine

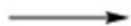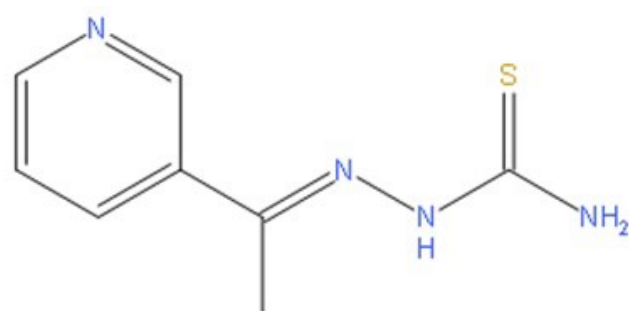

3-acetylpyridine thiosemicarbazone

Supplement: d2ra05192c2.pdf [file d2ra05192c2.pdf]

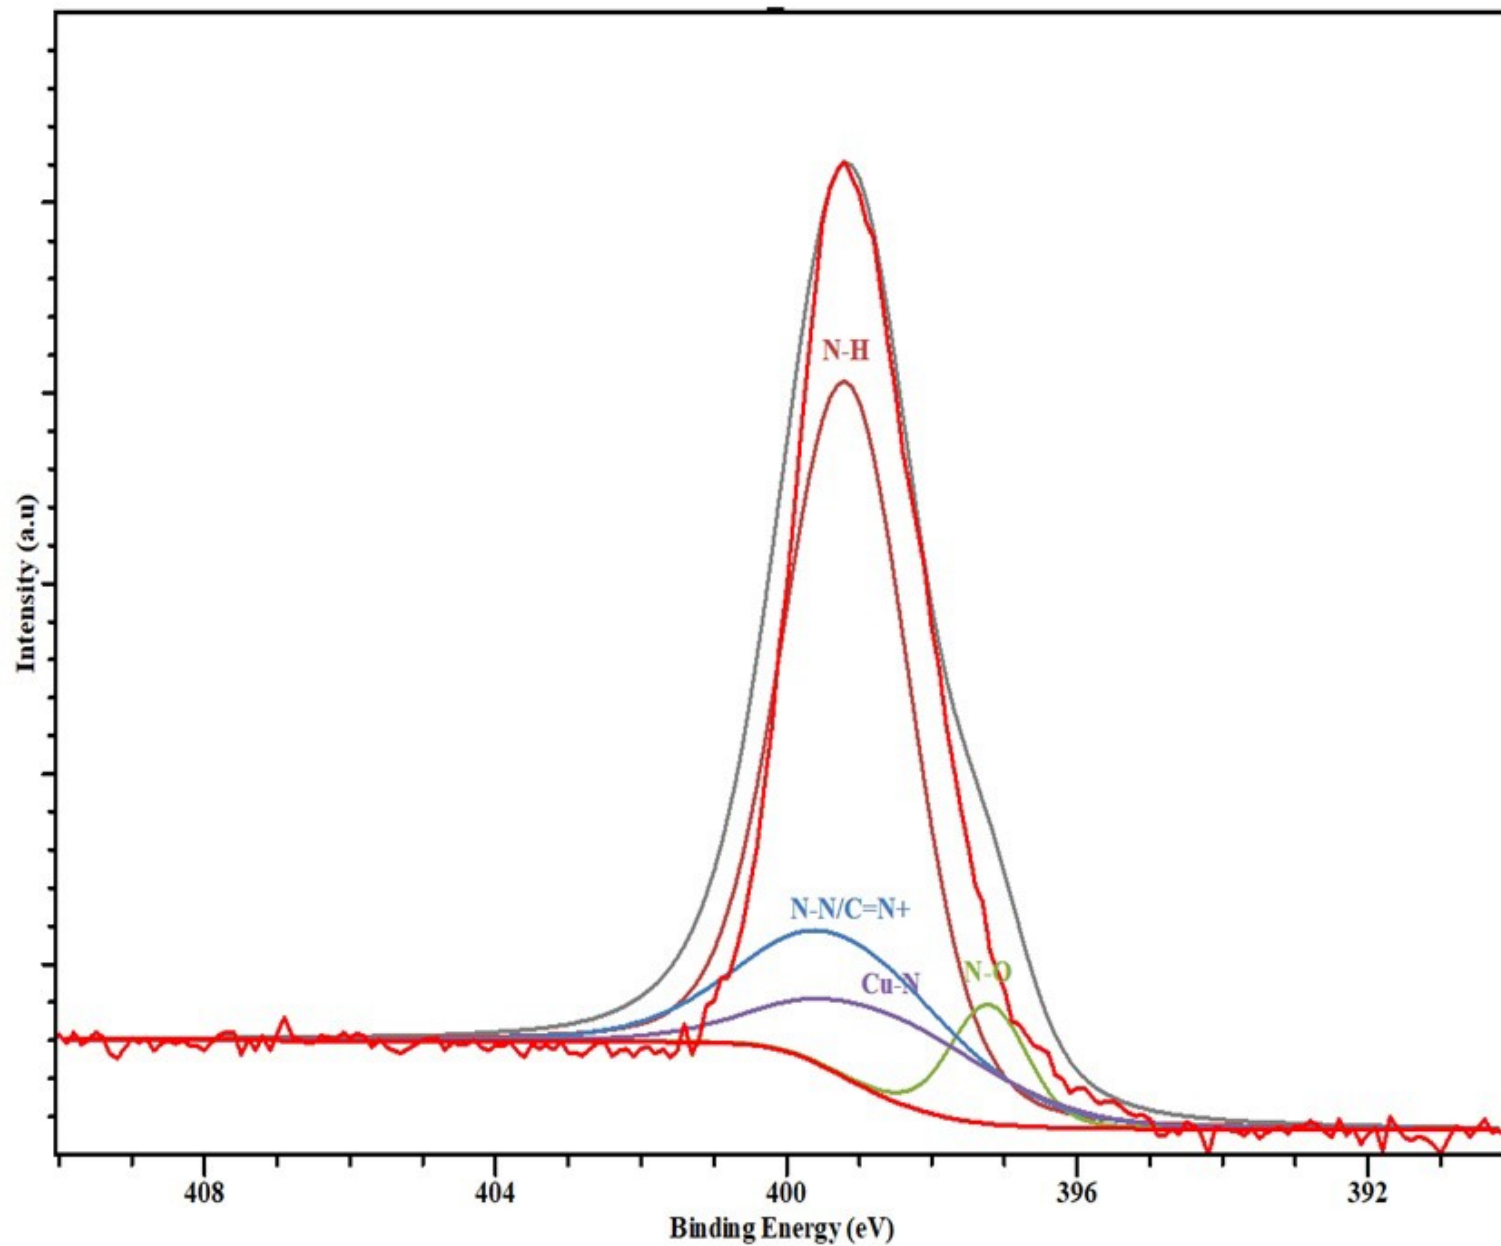

Supplement: d2ra05192c3.pdf [file d2ra05192c3.pdf]

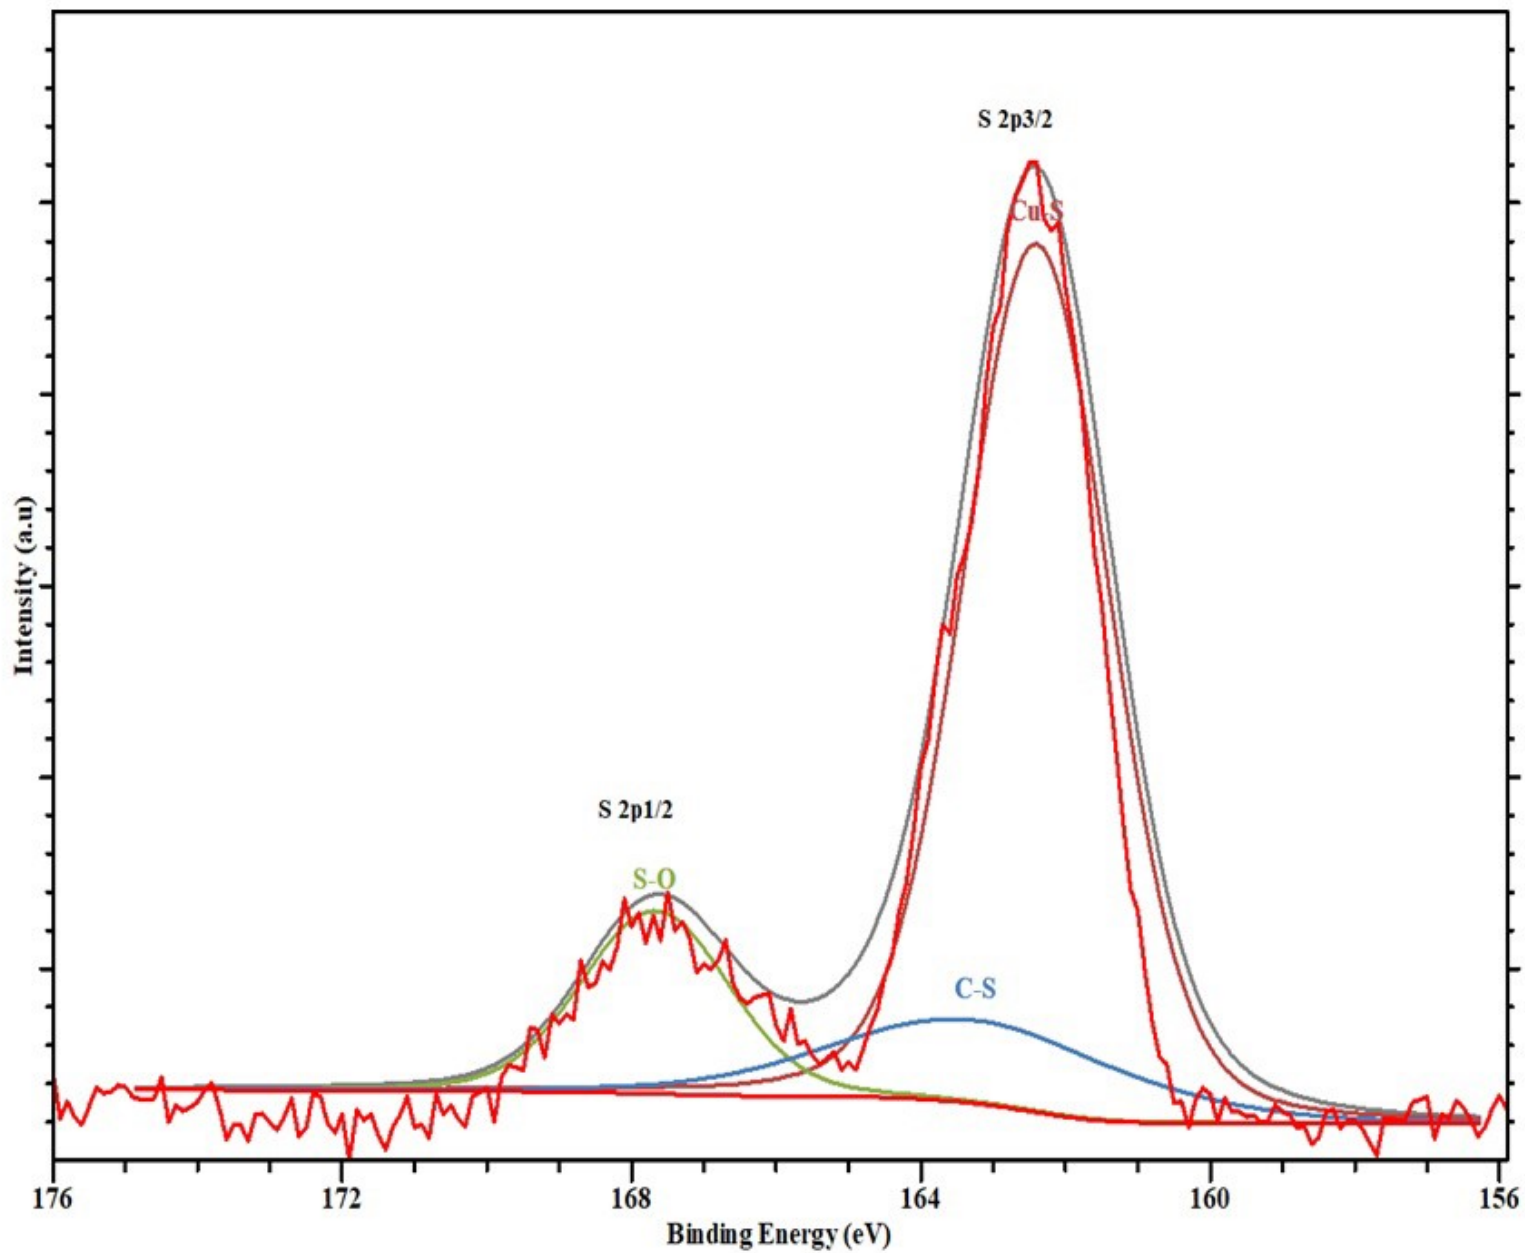

Supplement: d2ra05192c4.pdf [file d2ra05192c4.pdf]

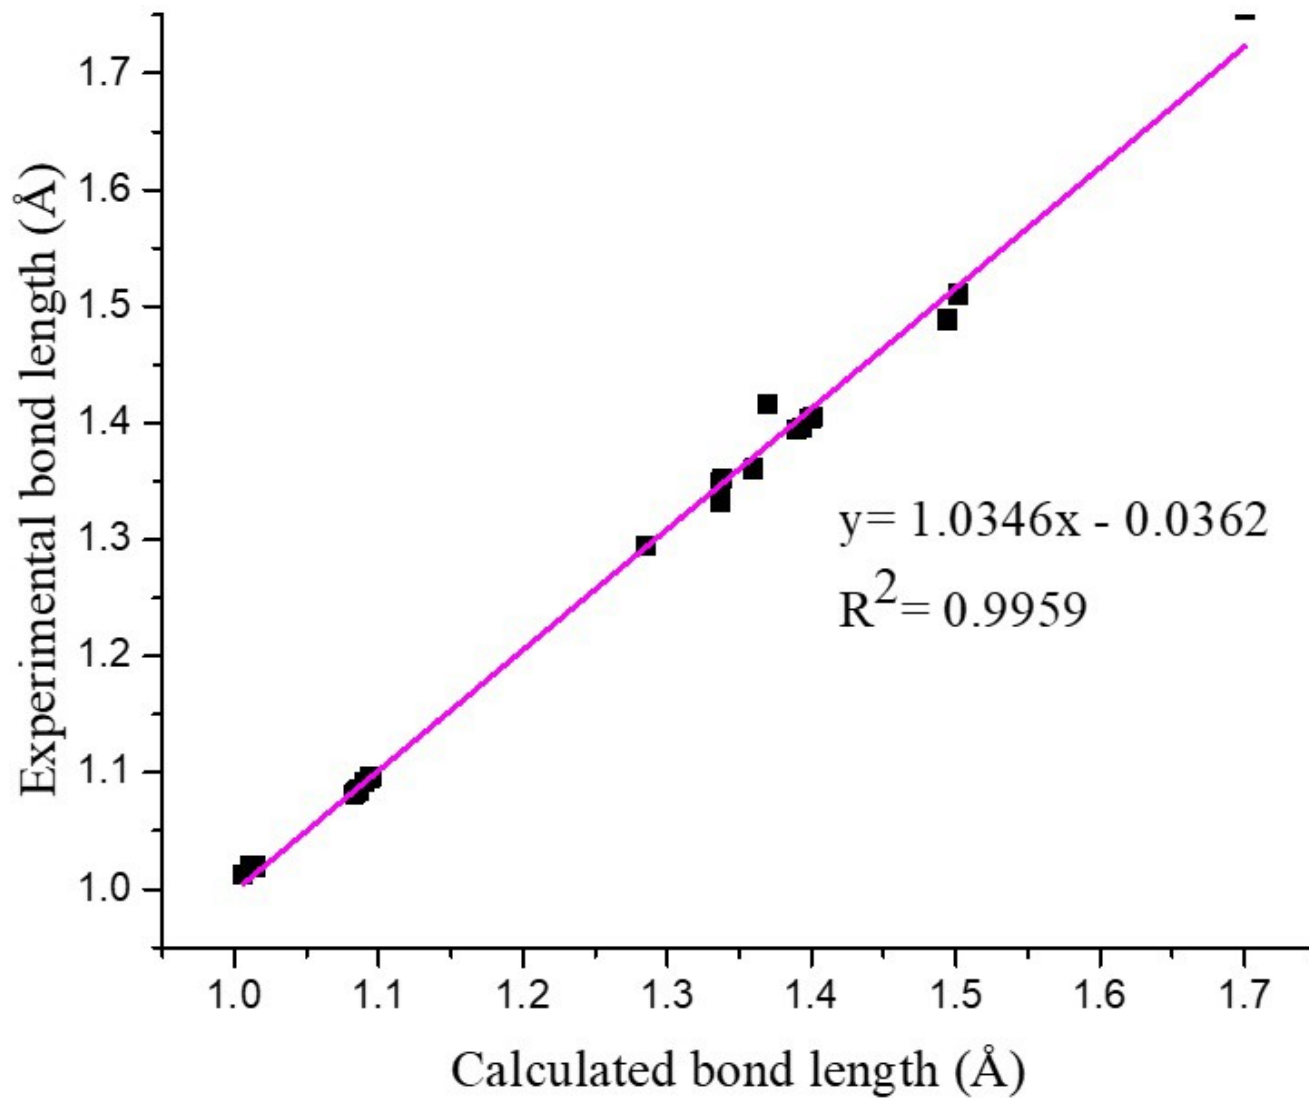

Supplement: d2ra05192c5.pdf [file d2ra05192c5.pdf]

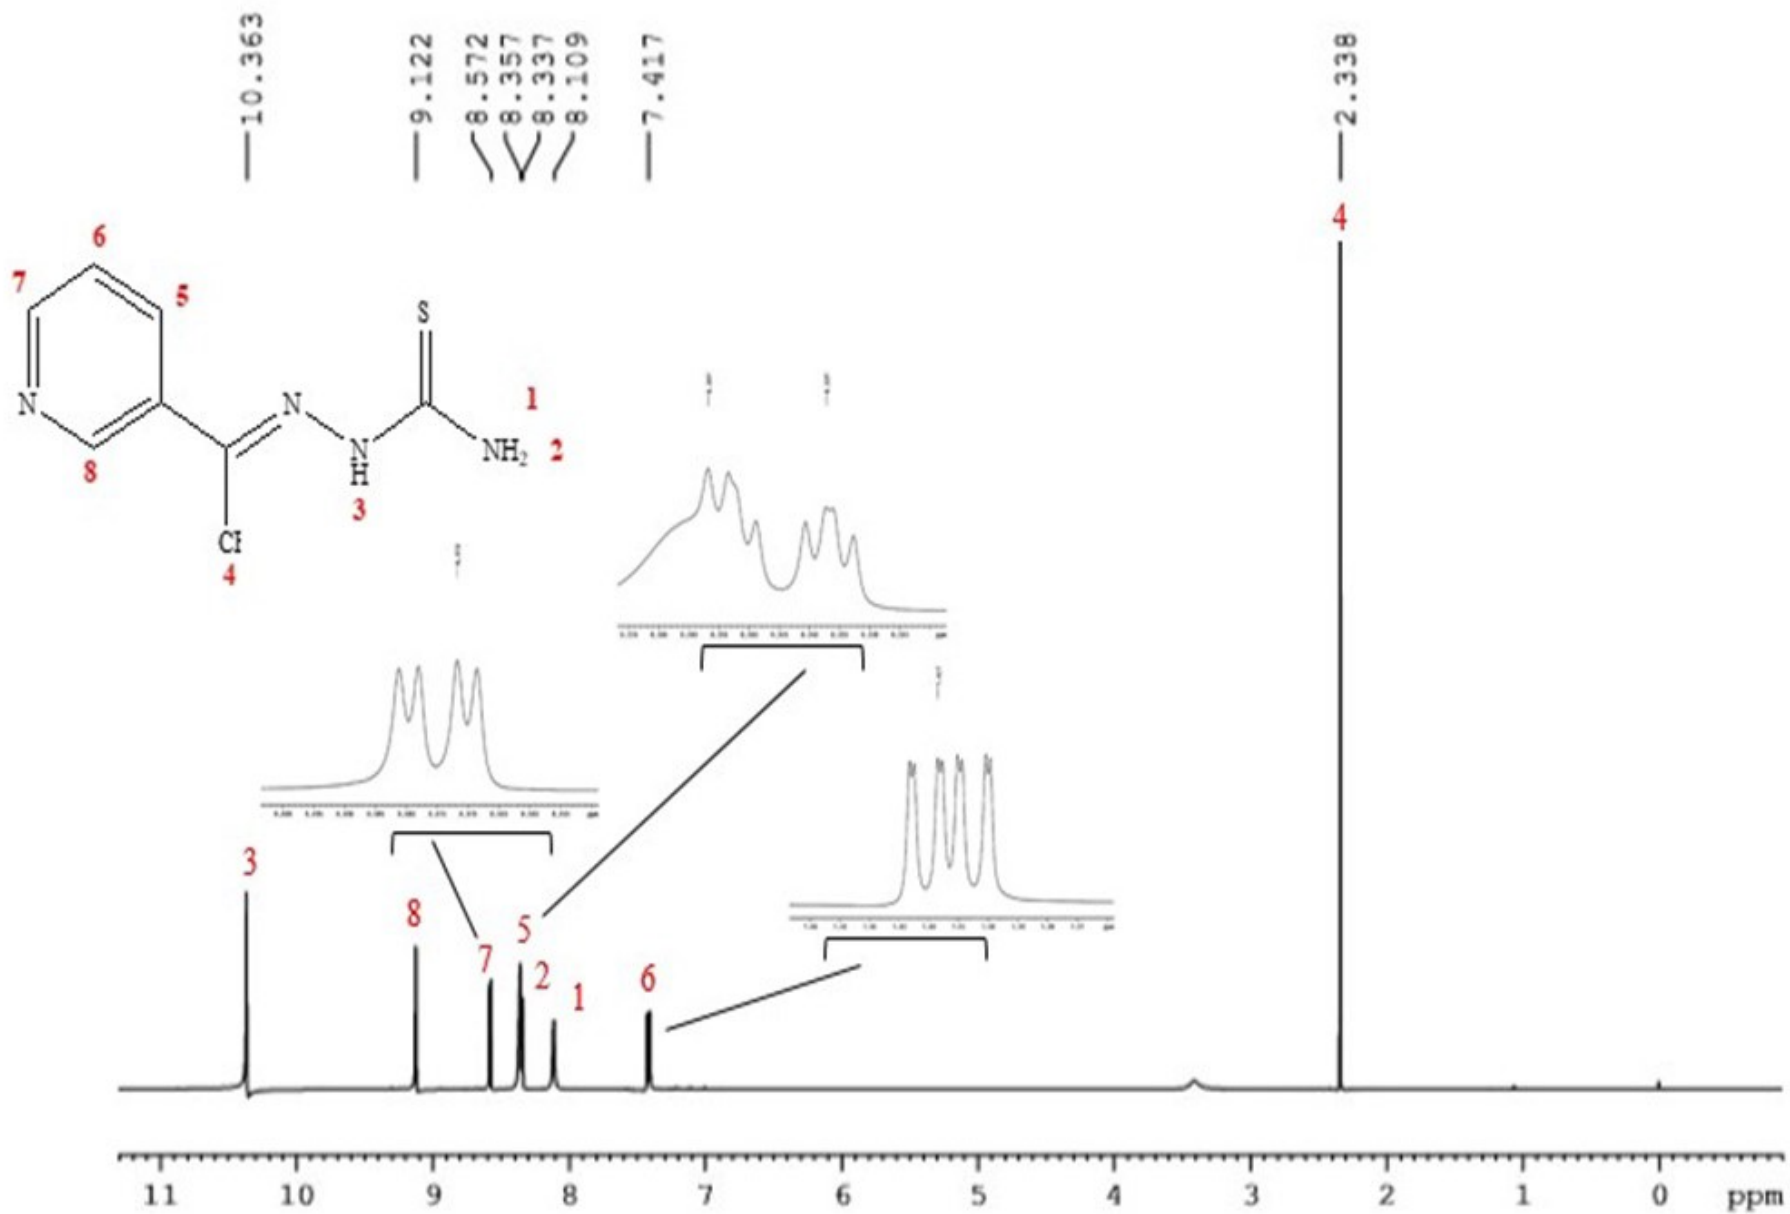

Supplement: d2ra05192c6.pdf [file d2ra05192c6.pdf]

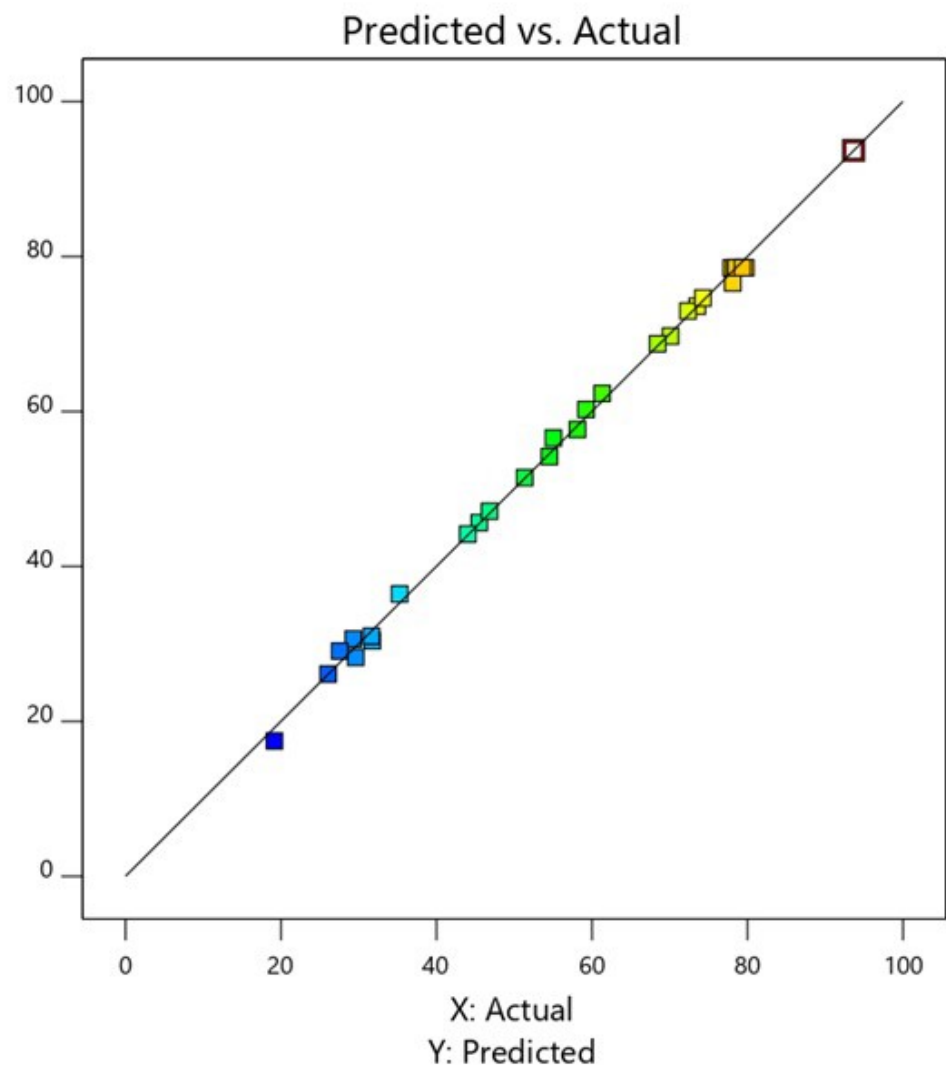

(a)

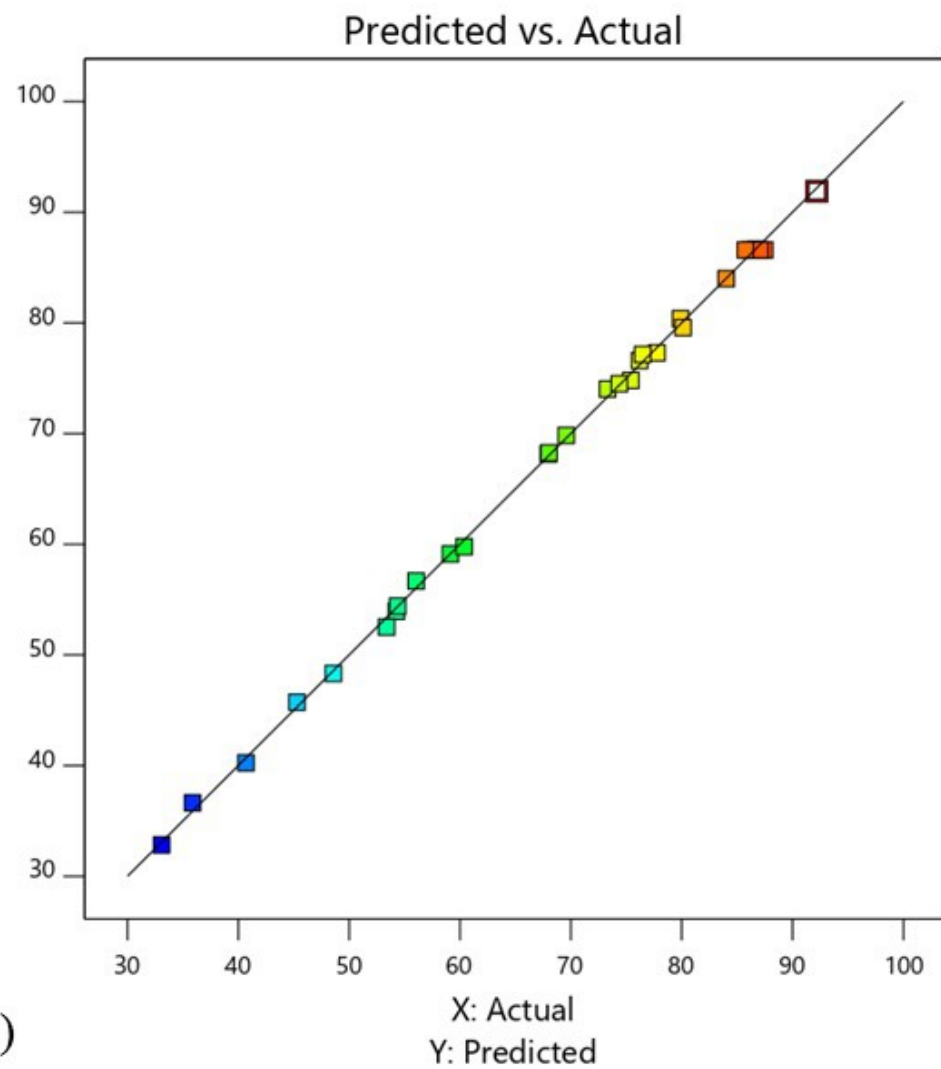

(b)

Supplement: d2ra05192c8.pdf [file d2ra05192c8.pdf]

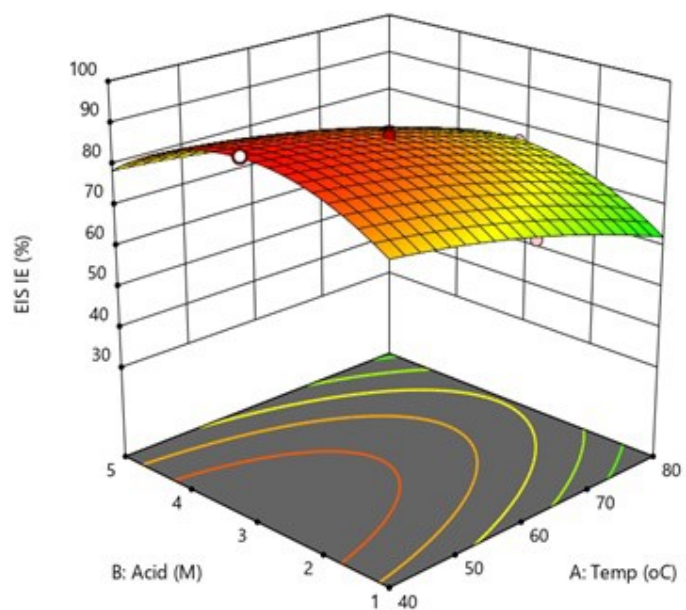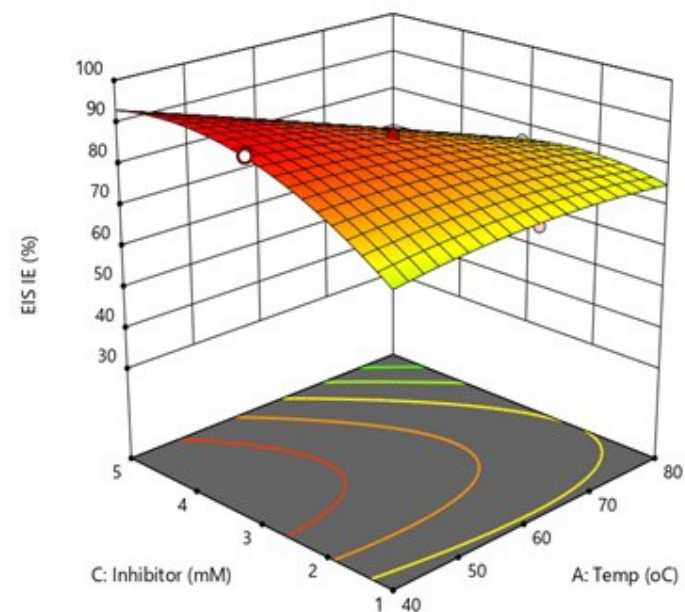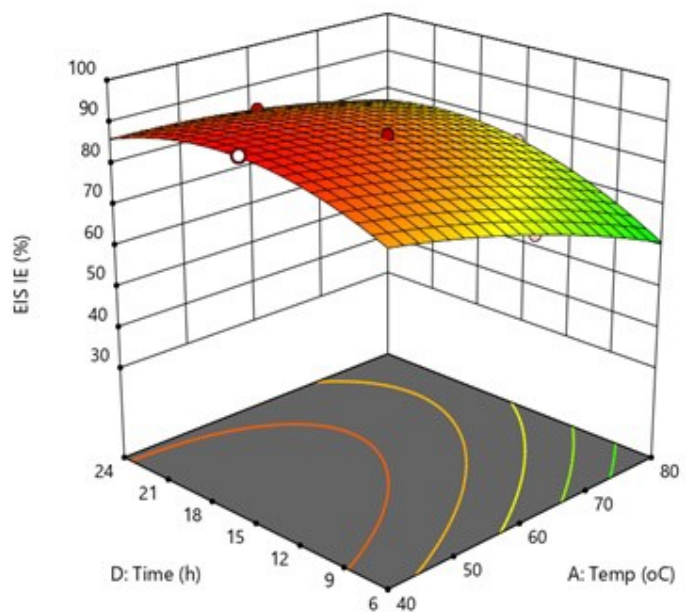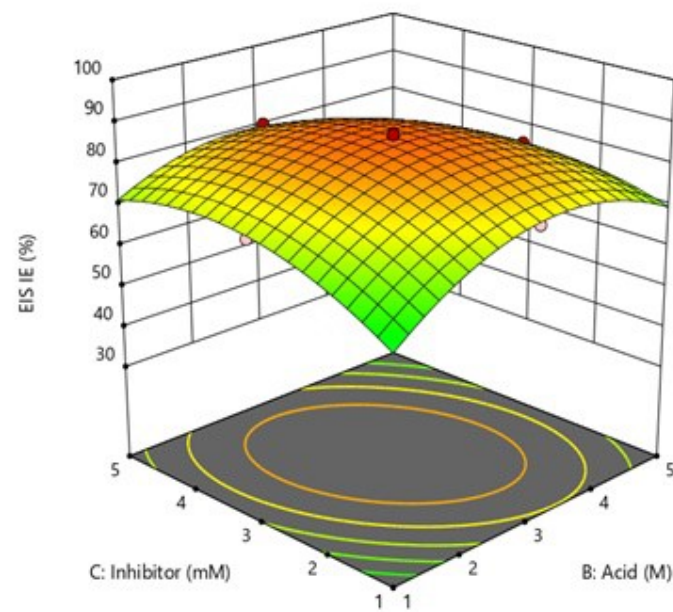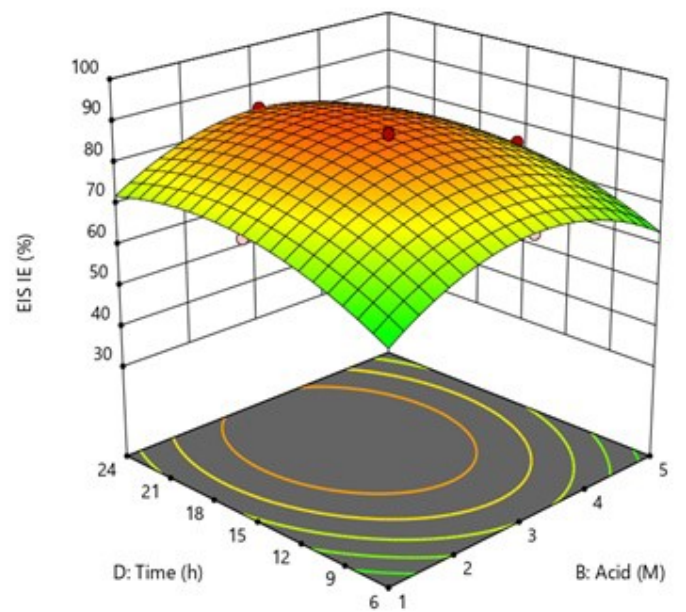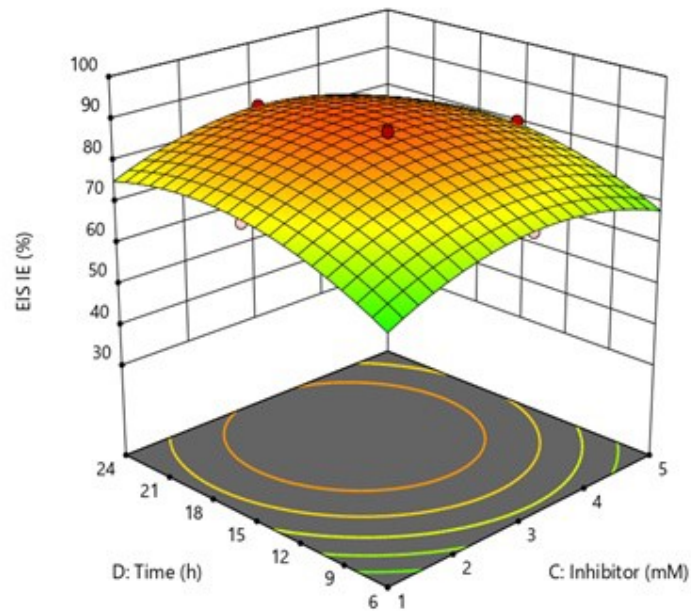

Supplement: d2ra05192c9.pdf [file d2ra05192c9.pdf]
